# Supplementary material
Source: Springer Nature journal article supplement (https://www.springerprofessional.de/resource/supplementary/13638_2012_729_MOESM4_ESM.pdf/11898280)

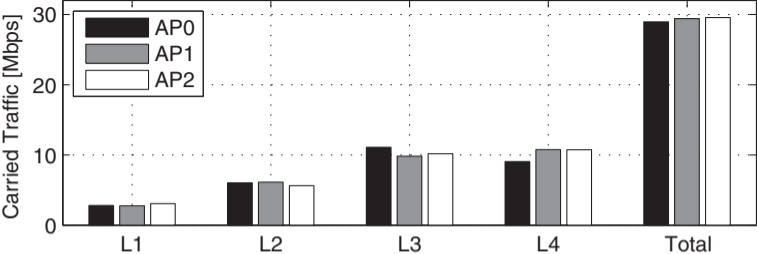

(a) 50% LTE penetration

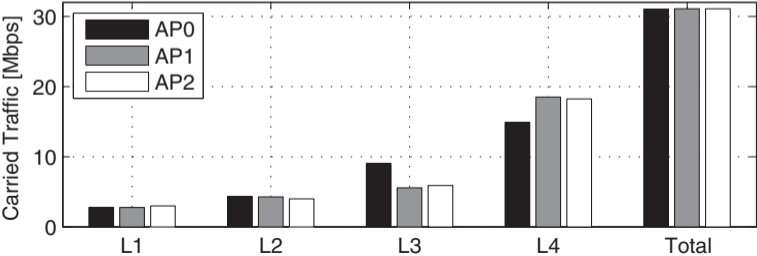

(b) 100% LTE penetration

Supplement: MOESM4 [file 11898280]
